# Supplementary material for: Correlates of self-reported exposure to advertising of tobacco products and electronic cigarettes across 28 European Union member states
Source: PubMed Central journal article supplement — Tob Control. 2017 Jun 12;26(e2):e130–3. doi: 10.1136/tobaccocontrol-2016-053479 (PMC5739859; doi:10.1136/tobaccocontrol-2016-053479), 2017-06-12
Supplement: tobaccocontrol-2016-053479supp001.pdf [file tobaccocontrol-2016-053479supp001.pdf]

**Supplementary Table 1. Association of frequent exposure to tobacco and e-cigarette advertisements or promotions with tobacco smoking, e-cigarette experimentation, internet use and sociodemographic factors in 28 European Union member states, Eurobarometer 2014.**

|                                     | Frequent exposure to tobacco advertisements<br>(n=25,528)<br>OR (95% CI) | Frequent exposure to e-cigarette advertisements<br>(n=25,528)<br>OR (95% CI) |
|-------------------------------------|--------------------------------------------------------------------------|------------------------------------------------------------------------------|
| Age (years)                         |                                                                          |                                                                              |
| ≥55 (ref.)                          | 1.00                                                                     | 1.00                                                                         |
| 40-54                               | <b>1.15 (1.06-1.25)</b>                                                  | <b>1.16 (1.06-1.27)</b>                                                      |
| 25-39                               | <b>1.22 (1.11-1.34)</b>                                                  | <b>1.24 (1.12-1.37)</b>                                                      |
| 15-24                               | <b>1.47 (1.30-1.65)</b>                                                  | <b>1.27 (1.12-1.44)</b>                                                      |
| Gender                              |                                                                          |                                                                              |
| Female (ref.)                       | 1.00                                                                     | 1.00                                                                         |
| Male                                | <b>1.25 (1.18-1.33)</b>                                                  | <b>1.09 (1.02-1.17)</b>                                                      |
| Difficulties paying bills           |                                                                          |                                                                              |
| Never / almost never (ref.)         | 1.00                                                                     | 1.00                                                                         |
| From time to time/ Most of the time | 1.05 (0.98-1.13)                                                         | 1.07 (0.99-1.16)                                                             |
| Age when stopped education (years)  |                                                                          |                                                                              |
| Up to 15 (ref.)                     | 1.00                                                                     | 1.00                                                                         |
| 16-19                               | <b>1.21 (1.10-1.35)</b>                                                  | <b>1.21 (1.08-1.36)</b>                                                      |
| ≥20                                 | <b>1.36 (1.22-1.53)</b>                                                  | <b>1.34 (1.19-1.52)</b>                                                      |
| Area of residence                   |                                                                          |                                                                              |
| Rural (ref.)                        | 1.00                                                                     | 1.00                                                                         |
| Urban                               | <b>1.12 (1.04-1.20)</b>                                                  | 1.06 (0.99-1.15)                                                             |
| Tobacco smoking                     |                                                                          |                                                                              |

|                               |                         |                         |
|-------------------------------|-------------------------|-------------------------|
| Never smokers (ref.)          | 1.00                    | 1.00                    |
| Current smoker                | <b>1.18 (1.09-1.28)</b> | <b>1.31 (1.20-1.43)</b> |
| Former smoker                 | 1.00 (0.92-1.09)        | <b>1.27 (1.16-1.38)</b> |
| Internet use                  |                         |                         |
| Never/ no access (ref.)       | 1.00                    | 1.00                    |
| Often/ sometimes              | <b>1.50 (1.33-1.69)</b> | <b>1.80 (1.57-2.06)</b> |
| Everyday                      | <b>1.67 (1.51-1.85)</b> | <b>2.41 (2.15-2.71)</b> |
| E-cigarette experimentation   |                         |                         |
| No (ref.)                     | 1.00                    | 1.00                    |
| Yes                           | <b>1.30 (1.18-1.45)</b> | <b>1.67 (1.51-1.86)</b> |
| TCS tobacco advertising score | <b>0.87 (0.79-0.96)</b> | 1.08 (0.92-1.28)        |

“Frequent exposure” defined as having been exposed to advertisements “from time to time” and “often”. Results from a multilevel regression model adjusted for all the variables in the table; country was the higher level of analysis. Statistically significant associations are printed in bold. TCS: Tobacco Control Scale
